# Supplementary material for: The Denaturant- and Mutation-Induced Disassembly of Pseudomonas aeruginosa Hexameric Hfq Y55W Mutant
Source: MDPI journal article supplement (doi:10.3390/molecules27123821), 2022-06-14
Supplement: s1 [file s1]

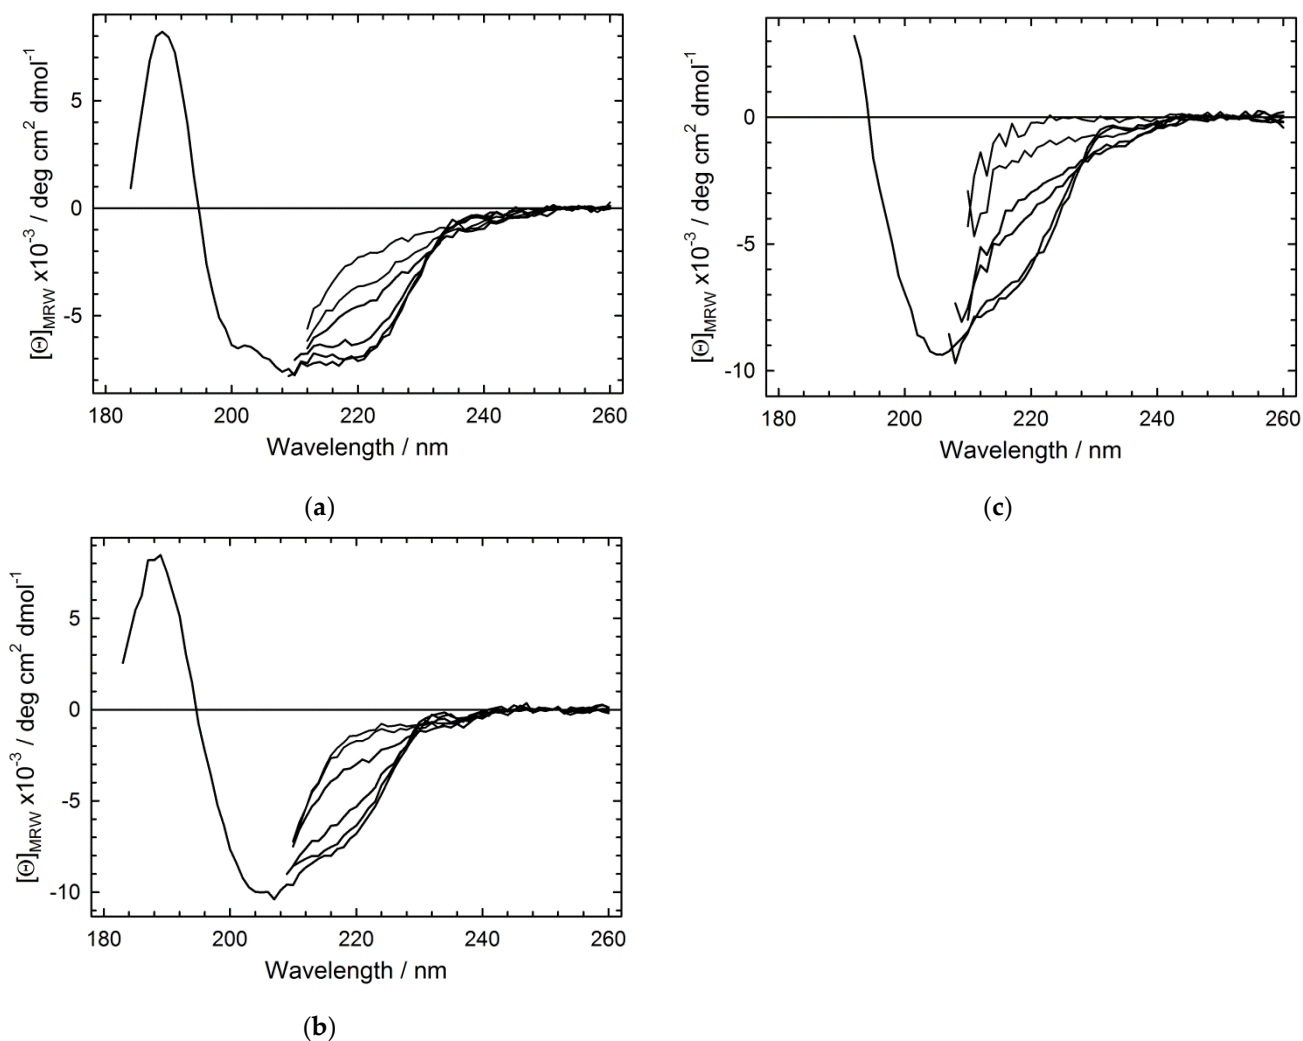

**Figure S1.** The selected far-UV CD spectra of Hfq variants for the crucial points of GuHCl-induced unfolding of the proteins: (a) WT Hfq at the protein concentration 66  $\mu\text{M}$  (monomer), GuHCl concentration from bottom to top: 0 M, 2.74 M, 3.18 M, 4.48 M, 4.68 M, 5.47 M; (b) Hfq Y55W mutant at the protein concentration 66  $\mu\text{M}$  (monomer), GuHCl concentration from bottom to top: 0 M, 1.44 M, 2.21 M, 2.67 M, 4.04 M, 5.1 M; (c) Hfq Y55W mutant at the protein concentration 6  $\mu\text{M}$  (monomer), GuHCl concentration from bottom to top: 0 M, 1.44 M, 2.21 M, 2.67 M, 4.04 M, 5.1 M.
